# Supplementary material
Source: MDPI journal article supplement (https://www.mdpi.com/2073-4441/9/3/214)
Supplement: s1 [file s1]

## Sheet: Title Page
This page will provide any information that is needed to review or use the excel document.
Development Table
Project	Annual AF	Capital Cost	Maintenance Cost	Net Power Costs	Envr. Mitigation costs	Cost per AF
Lake Powell (Low)	62996	1163325000	93093000	37052000	7.59748e+07	1414.13	1414.13
Lake Powell (High)	62996	1798652000	143890000	108566000	5.60519e+08	2696.84	2696.84
Bear River B	220000	1682987723	133038400	97200000	801265000	802.643	802.643
Bear River M	220000	1823983888	144196000	97200000	117715000	645.516	645.516
Outdoor Residential
Measure	AF Conserved	Average Cost per AF
Rainwater Harvesting	11885.6	482.225
Watering at Night	12666	0
Seasonal Scheduling	90335.2	108.927
Turf Conversion	104708	3507.9
Indoor Residential
Type of Replacement	Number Replaced	AF Conserved	Average Cost per AF
Toilets	1.36198e+06	41666.6	672.588
Showers	371424	5692.53	240.733
Washing Machines	375424	4804.13	6145.37
Development Table
Project	Annual AF	Capital Cost	Maintenance Cost	Net Power Costs	Envr. Mitigation costs	Cost per AF
Lake Powell (Low)	62996	$1163M	$93M	$37M	$75M	1414.13
Lake Powell (High)	62996	$1798M	$143M	$108M	$560M	2696.84
Bear River B	220000	$1682M	$133M	$97M	$801M	802.643
Bear River M	220000	$1823M	$144M	$97M	$117M	645.516

## Sheet: Agriculture- Sprinklers
Information Used To Create Formulas				County	Surface Irrigation for crops, in thousand acres	Sprinkler Irrigation for crops, in thousand acres	Irrigation for crops, in thousand acres	Total self-supplied withdrawals, in Mgal/d	Withdrawals (AF) per year	Percent Water for Surface Irrigation	Water for Surface Irrigation (AF)	Water Savings (AF)	Total Amortized Conversion Cost	Cost per AF		County	Sprinkler Withdrawals	Surface Conversion	Savings from Surface Conversion	New water use	Improve Efficiency Savings	Total Cost Low	Total Cost High	Per AF cost (low)	Per Af cost (high)	Average Per AF Cost	New Water Use	Conversion Savings	Efficiency Savings	Piping Savings	Total Savings	Savings Efficiency+Conversion	County	New Water Use	Conversion Savings	Efficiency Savings	Piping Savings
Flood Irrigation Efficiency	0.7		Beaver County	Beaver	8.79	23.46	32.25	77.8	87147.5	0.299821	26128.6	3266.08	512407	156.887		Beaver County	61018.8	22862.6	3266.08	83881.4	8723.66	1128750	1451250	129.389	166.358	147.874	2.24992	0.101274	0.270501	0.351049	23311.1	11989.7	Beaver	75157.7	3266.08	8723.66	11321.3
Sprinkler Irrigation Efficiency	0.8		Box Elder County	Box Elder	99.43	53.39	152.82	380.56	426283	0.680346	290020	36252.5	5.7962e+06	159.884		Box Elder County	136263	253768	36252.5	390031	40563.2	5348700	6876900	131.861	169.535	150.698	2.23907	0.237224	0.265431	0.313155	124672	76815.7	Box Elder	349468	36252.5	40563.2	47856.3
Sprinkler Irrigation Cost (Acre)	58.31		Cache County	Cache	41.13	65.05	106.18	237.06	265542	0.419485	111391	13923.9	2.39764e+06	172.197		Cache County	154151	97467.1	13923.9	251618	26168.3	3716300	4778100	142.015	182.591	162.303	2.02201	0.131135	0.246452	0.347724	77013.5	40092.2	Cache	225450	13923.9	26168.3	36921.4
USGS Data	2010		Carbon County	Carbon	8.07	4.29	12.36	31.63	35430.3	0.682525	24182	3022.75	470435	155.631		Carbon County	11248.2	21159.3	3022.75	32407.5	3370.38	432600	556200	128.353	165.026	146.69	2.22842	0.244559	0.272685	0.393543	11257.3	6393.13	Carbon	29037.1	3022.75	3370.38	4864.19
Return flow surface	0.45		Daggett County	Daggett	8.28	2.53	10.81	18.06	20229.9	0.789041	15962.2	1995.27	482677	241.91		Daggett County	4267.67	13966.9	1995.27	18234.6	1896.4	378350	486450	199.51	256.513	228.011	1.47645	0.184577	0.17543	0.210376	6165.84	3891.67	Daggett	16338.2	1995.27	1896.4	2274.17
Return flow sprinkler	0.15		Davis County	Davis	14.7	4.82	19.52	40.27	45108.3	0.777058	35051.8	4381.48	856926	195.579		Davis County	10056.5	30670.3	4381.48	40726.9	4235.59	683200	878400	161.3	207.385	184.343	1.6518	0.224461	0.216987	0.434614	17100.7	8617.07	Davis	36491.3	4381.48	4235.59	8483.67
Conversion Cost			Duchesne County	Duchesne	53.76	70.16	123.92	321.09	359668	0.466869	167918	20989.7	3.1339e+06	149.306		Duchesne County	191750	146928	20989.7	338678	35222.5	4337200	5576400	123.137	158.319	140.728	2.41762	0.169381	0.284236	0.315421	95299.3	56212.3	Duchesne	303456	20989.7	35222.5	39087
Acres	134		Emery County	Emery	34.25	20.24	54.49	101.34	113516	0.659161	74825.1	9353.14	1.99658e+06	213.466		Emery County	38690.6	65472	9353.14	104163	10832.9	1.90715e+06	2.45205e+06	176.052	226.352	201.202	1.68241	0.171649	0.198805	0.229176	32673.9	20186.1	Emery	93329.7	9353.14	10832.9	12487.8
Total cost	96000		Garfield County	Garfield	13.28	20.11	33.39	60.01	67220	0.430104	28911.6	3613.95	774148	214.211		Garfield County	38308.4	25297.7	3613.95	63606.1	6615.03	1168650	1502550	176.666	227.142	201.904	1.63035	0.108235	0.198114	0.274595	19397.7	10229	Garfield	56991.1	3613.95	6615.03	9168.73
Life (years)	25		Grand County	Grand	2.12	3.37	5.49	12.36	13845	0.418249	5790.67	723.833	123584	170.735		Grand County	8054.35	5066.83	723.833	13121.2	1364.6	192150	247050	140.81	181.042	160.926	2.0683	0.131846	0.248562	0.321715	3854.65	2088.44	Grand	11756.6	723.833	1364.6	1766.22
Maintenance (per year)	1000		Iron County	Iron	2.71	57.22	59.93	195.53	219022	0.0513476	11246.3	1405.79	157978	112.377		Iron County	207776	9840.5	1405.79	217617	22632.1	2097550	2696850	92.6802	119.16	105.92	3.18866	0.0234571	0.377643	0.442518	50558	24037.9	Iron	194984	1405.79	22632.1	26520.1
Yearly Cost (per acre)	58.2943		Juab County	Juab	7.66	20.58	28.24	50.6	56679.5	0.298432	16915	2114.37	446534	211.19		Juab County	39764.5	14800.6	2114.37	54565.1	5674.77	988400	1270800	174.174	223.939	199.057	1.67868	0.0748714	0.200948	0.253514	14948.4	7789.14	Juab	48890.3	2114.37	5674.77	7159.23
Per-acre up-front cost	716.418		Kane County	Kane	3.98	3.3	7.28	14.36	16085.3	0.579541	9322.1	1165.26	232011	199.106		Kane County	6763.21	8156.84	1165.26	14920.1	1551.69	254800	327600	164.209	211.125	187.667	1.64335	0.160064	0.213144	0.40611	5673.43	2716.95	Kane	13368.4	1165.26	1551.69	2956.48
Efficiency			Millard County	Millard	59.85	39.84	99.69	263.63	295304	0.631929	186611	23326.4	3.48891e+06	149.569		Millard County	108693	163285	23326.4	271978	28285.7	3489150	4486050	123.354	158.598	140.976	2.39982	0.23399	0.283737	0.328418	84352.1	51612.1	Millard	243692	23326.4	28285.7	32740
Efficiency increase	0.13		Morgan County	Morgan	7.17	2.78	9.95	33.93	38006.6	0.746681	28378.8	3547.35	417970	117.826		Morgan County	9627.81	24831.4	3547.35	34459.2	3583.76	348250	447750	97.1744	124.939	111.056	2.7102	0.356517	0.360177	0.753039	14623.8	7131.11	Morgan	30875.5	3547.35	3583.76	7492.74
Cost low (per acre)	35		Piute County	Piute	13.49	6.27	19.76	44.32	49644.9	0.710889	35292	4411.5	786390	178.259		Piute County	14352.9	30880.5	4411.5	45233.4	4704.28	691600	889200	147.015	189.02	168.017	1.95528	0.223254	0.238071	0.333857	15712.8	9115.78	Piute	40529.2	4411.5	4704.28	6597.01
Cost high (per acre)	45		Rich County	Rich	58.58	9.38	67.96	141.86	158904	0.87711	139376	17422.1	3.41488e+06	196.009		Rich County	19527.7	121954	17422.1	141482	14714.1	2378600	3058200	161.654	207.841	184.748	1.80901	0.256357	0.216512	0.272837	50678.2	32136.2	Rich	126768	17422.1	14714.1	18542
Farms already High	0.2		Salt Lake County	Salt Lake	5.76	4.92	10.68	47.58	53296.6	0.57228	30500.6	3812.57	335775	88.0705		Salt Lake County	22796	26688	3812.57	49484	5146.34	373800	480600	72.6341	93.3868	83.0105	3.42945	0.356983	0.481867	1.20389	21816.4	8958.91	Salt Lake	44337.7	3812.57	5146.34	12857.5
			San Juan County	San Juan	2.94	5.11	8.05	20.77	23265.5	0.396694	9229.27	1153.66	171385	148.558		San Juan County	14036.2	8075.61	1153.66	22111.8	2299.63	281750	362250	122.52	157.526	140.023	2.33977	0.143312	0.285668	0.407035	6729.92	3453.29	San Juan	19812.2	1153.66	2299.63	3276.63
			Sanpete County	Sanpete	46.51	51.2	97.71	168.21	188420	0.509364	95974.3	11996.8	2.71127e+06	225.999		Sanpete County	92445.7	83977.5	11996.8	176423	18348	3.41985e+06	4.39695e+06	186.388	239.642	213.015	1.54218	0.12278	0.18778	0.2634	56081.6	30344.8	Sanpete	158075	11996.8	18348	25736.8
			Sevier County	Sevier	39.48	13.27	52.75	133.47	149506	0.772735	115529	14441.1	2.30146e+06	159.369		Sevier County	33977.5	101088	14441.1	135065	14046.8	1846250	2373750	131.436	168.989	150.213	2.21337	0.273764	0.266289	0.347099	46797.3	28487.8	Sevier	121018	14441.1	14046.8	18309.5
			Summit County	Summit	26.02	5.91	31.93	55.15	61776.1	0.834208	51534.2	6441.77	1.51682e+06	235.466		Summit County	10242	45092.4	6441.77	55334.4	5754.77	1117550	1436850	194.195	249.68	221.938	1.31841	0.201747	0.180231	0.414575	25433.9	12196.5	Summit	49579.6	6441.77	5754.77	13237.4
			Tooele County	Tooele	8.81	18.61	27.42	58.33	65338.2	0.351083	22939.2	2867.39	513573	179.108		Tooele County	42399	20071.8	2867.39	62470.8	6496.96	959700	1233900	147.715	189.92	168.817	1.96659	0.104573	0.236942	0.311704	17911.3	9364.36	Tooele	55973.8	2867.39	6496.96	8546.92
			Uintah County	Uintah	34.16	46.86	81.02	227.42	254744	0.454482	115777	14472.1	1.99133e+06	137.598		Uintah County	138967	101304	14472.1	240272	24988.3	2835700	3.6459e+06	113.481	145.904	129.693	2.61968	0.178623	0.308421	0.34591	67485.9	39460.3	Uintah	215284	14472.1	24988.3	28025.6
			Utah County	Utah	56.58	35.05	91.63	241.6	270628	0.648491	175499	21937.4	3.29829e+06	150.35		Utah County	95128.1	153562	21937.4	248690	25863.8	3.20705e+06	4.12335e+06	123.998	159.426	141.712	2.35397	0.239413	0.282263	0.360095	80796.7	47801.2	Utah	222826	21937.4	25863.8	32995.5
			Wasatch County	Wasatch	6.28	10.35	16.63	44.09	49387.3	0.409487	20223.5	2527.93	366088	144.817		Wasatch County	29163.8	17695.5	2527.93	46859.4	4873.37	582050	748350	119.435	153.559	136.497	2.39729	0.15201	0.293047	0.420468	14393.7	7401.31	Wasatch	41986	2527.93	4873.37	6992.39
			Washington County	Washington	6.35	7.01	13.36	77.63	86957	0.508661	44231.7	5528.96	370169	66.9509		Washington County	42725.4	38702.7	5528.96	81428.1	8468.52	467600	601200	55.2163	70.9923	63.1043	5.20497	0.413844	0.633871	0.889941	25887.1	13997.5	Washington	72959.6	5528.96	8468.52	11889.6
			Wayne County	Wayne	6.02	14.3	20.32	47.55	53263	0.324835	17301.7	2162.71	350932	162.265		Wayne County	35961.3	15139	2162.71	51100.3	5314.43	711200	914400	133.824	172.06	152.942	2.18174	0.106433	0.261537	0.333036	14244.4	7477.14	Wayne	45785.9	2162.71	5314.43	6767.29
			Weber County	Weber	32.73	5.48	38.21	73.33	82140.4	0.872219	71644.4	8955.55	1.90797e+06	213.049		Weber County	10496	62688.8	8955.55	73184.9	7611.22	1.33735e+06	1.71945e+06	175.708	225.91	200.809	1.5345	0.234377	0.199195	0.380837	31118.6	16566.8	Weber	65573.6	8955.55	7611.22	14551.8
							Sprinklers			Efficient Irrigation
Water Savings Per Region (Acre-Foot)	Sprinklers	Scheduling					Water saved, (AF) per year	Cost per (AF)	Total Cost Per Region	Water saved, (AF) per year	Cost per (AF)	Total Cost Per Region
Eastern	64013	102283			Southernwestern Utah
Northern	122070	145011				Washington County	5528.96	66.9509	370169	8468.52	63.1043	534400
Southwestern	61130.4	102056				Iron County	1405.79	112.377	157978	22632.1	105.92	2397200
Total Utah	247213	349351				Beaver County	3266.08	156.887	512407	8723.66	147.874	1290000
						Millard County	23326.4	149.569	3.48891e+06	28285.7	140.976	3.9876e+06
						Sevier County	14441.1	159.369	2.30146e+06	14046.8	150.213	2110000
						Kane County	1165.26	199.106	232011	1551.69	187.667	291200
Total Cost Per Region	Sprinklers	Scheduling				Sanpete County	11996.8	225.999	2.71127e+06	18348	213.015	3.9084e+06
Eastern	1.07279e+07	15914000					61130.4	159.891	9.7742e+06	102056	142.262	14518800
Northern	2.08221e+07	2.29172e+07			Nothern Utah
Southwestern	9.7742e+06	14518800				Salt Lake County	3812.57	88.0705	335775	5146.34	83.0105	427200
Total Utah	4.13242e+07	53350000				Morgan County	3547.35	117.826	417970	3583.76	111.056	398000
						Wasatch County	2527.93	144.817	366088	4873.37	136.497	665200
						Utah County	21937.4	150.35	3.29829e+06	25863.8	141.712	3.6652e+06
						Box Elder County	36252.5	159.884	5.7962e+06	40563.2	150.698	6.1128e+06
Weighted Cost Per Acre-Foot Per Region	Sprinklers	Scheduling				Cache County	13923.9	172.197	2.39764e+06	26168.3	162.303	4247200
Eastern	167.589	155.588				Tooele County	2867.39	179.108	513573	6496.96	168.817	1096800
Northern	170.576	158.037				Davis County	4381.48	195.579	856926	4235.59	184.343	780800
Southwestern	159.891	142.262				Rich County	17422.1	196.009	3.41488e+06	14714.1	184.748	2718400
Total Utah	167.16	152.712				Weber County	8955.55	213.049	1.90797e+06	7611.22	200.809	1.5284e+06
						Summit County	6441.77	235.466	1.51682e+06	5754.77	221.938	1277200
							122070	170.576	2.08221e+07	145011	158.037	2.29172e+07
					Eastern Utah
						Uintah County	14472.1	137.598	1.99133e+06	24988.3	129.693	3240800
						San Juan County	1153.66	148.558	171385	2299.63	140.023	322000
						Duchesne County	20989.7	149.306	3.1339e+06	35222.5	140.728	4956800
						Wayne County	2162.71	162.265	350932	5314.43	152.942	812800
						Carbon County	3022.75	155.631	470435	3370.38	146.69	494400
						Grand County	723.833	170.735	123584	1364.6	160.926	219600
						Piute County	4411.5	178.259	786390	4704.28	168.017	790400
						Juab County	2114.37	211.19	446534	5674.77	199.057	1129600
						Garfield County	3613.95	214.211	774148	6615.03	201.904	1335600
						Emery County	9353.14	213.466	1.99658e+06	10832.9	201.202	2.1796e+06
						Daggett County	1995.27	241.91	482677	1896.4	228.011	432400
							64013	167.589	1.07279e+07	102283	155.588	15914000

## Sheet: Agriculture- Piping 
Information Used To Create Formulas						County Name		# of Canal Companies	Total Ag Withdrawals (Mgal/d)	Per Company Withdrawals (Mgal/d)	Tot Surface Withdrawls (AF/year)	Avg Withdrawls (AF/year)	Cost per AF	Total Water Savings (AF/year)	Total County Savings
Savings constant	140.967					Beaver	Beaver County	26	77.8	2.99231	75157.7	2890.68	74.1297	870.871	11321.3
Savings coeff	0.252502					Box Elder	Box Elder County	53	380.56	7.18038	349468	6593.73	66.6062	1805.9	47856.3
cost constant	80.0027					Cache	Cache County	120	237.06	1.9755	225450	1878.75	76.1856	615.356	36921.4
cost coeff	-0.0020317					Carbon	Carbon County	17	31.63	1.86059	29037.1	1708.07	76.5324	572.258	4864.19
						Daggett	Daggett County	3	18.06	6.02	16338.2	5446.06	68.9379	1516.11	2274.17
Location	Project Cost	Savings	Ammoritized cost	Cost per (AF)		Davis	Davis County	55	40.27	0.732182	36491.3	663.478	78.6547	308.497	8483.67
Huntsville, Weber County	3744054	1842	243556	132.224		Duchesne	Duchesne County	11	321.09	29.19	303456	27586.9	23.9544	7106.72	39087
North Logan, Cache County	2644256	1534.44	172013	112.101		Emery	Emery County	10	101.34	10.134	93329.7	9332.97	61.0409	2497.56	12487.8
Newton, Cache County	3560000	1980	231583	116.961		Garfield	Garfield County	28	60.01	2.14321	56991.1	2035.39	75.8674	654.909	9168.73
Woodruff, Rich County	4200000	4500	273216	60.7147		Grand	Grand County	4	12.36	3.09	11756.6	2939.15	74.0312	883.109	1766.22
Oakley, Summit County	2480500	2919	161360	55.2792		Iron	Iron County	27	195.53	7.24185	194984	7221.65	65.3305	1964.45	26520.1
Fruitand, Duchesne County	737000	1500	47942.9	31.9619		Juab	Juab County	14	50.6	3.61429	48890.3	3492.17	72.9077	1022.75	7159.23
Daniel, Wasatch	498000	2003.4	32395.6	16.1703		Kane	Kane County	18	14.36	0.797778	13368.4	742.687	78.4938	328.498	2956.48
Payson, Utah	657000	450	42738.8	94.9751		Millard	Millard County	28	263.63	9.41536	243692	8703.3	62.3202	2338.57	32740
	4500000	3800	292731	77.0346		Morgan	Morgan County	51	33.93	0.665294	30875.5	605.402	78.7727	293.833	7492.74
	219403	413	14272.5	34.5581		Piute	Piute County	21	44.32	2.11048	40529.2	1929.96	76.0816	628.287	6597.01
	498960	444	32458.1	73.1037		Rich	Rich County	36	141.86	3.94056	126768	3521.33	72.8484	1030.11	18542
	324544	1065	21112.1	19.8235		Salt Lake	Salt Lake County	103	47.58	0.461942	44337.7	430.463	79.1281	249.66	12857.5
						San Juan	San Juan County	11	20.77	1.88818	19812.2	1801.11	76.3434	595.751	3276.63
						Sanpete	Sanpete County	82	168.21	2.05134	158075	1927.75	76.0861	627.728	25736.8
Water Savings Per Region (Acre-Foot)						Sevier	Sevier County	43	133.47	3.10395	121018	2814.38	74.2847	851.604	18309.5
Eastern	121474					Summit	Summit County	99	55.15	0.557071	49579.6	500.804	78.9852	267.422	13237.4
Northern	208478					Tooele	Tooele County	21	58.33	2.77762	55973.8	2665.42	74.5874	813.993	8546.92
Southwestern	129474					Uintah	Uintah County	12	227.42	18.9517	215284	17940.3	43.5534	4670.94	28025.6
Total Utah	459425					Utah	Utah County	69	241.6	3.50145	222826	3229.37	73.4416	956.391	32995.5
						Wasatch	Wasatch County	24	44.09	1.83708	41986	1749.42	76.4484	582.699	6992.39
Weighted Cost Per Acre-Foot Per Region						Washington	Washington County	38	77.63	2.04289	72959.6	1919.99	76.1019	625.769	11889.6
Eastern	44.206					Wayne	Wayne County	14	47.55	3.39643	45785.9	3270.42	73.3582	966.756	6767.29
Northern	73.9135					Weber	Weber County	89	73.33	0.823933	65573.6	736.782	78.5058	327.007	14551.8
Southwestern	70.0327														459425
Total Utah	57.9038
								Water saved, (AF) per year	Cost per (AF)
						Southernwestern Utah
							Washington County	11889.6	76.1019
							Iron County	26520.1	65.3305
							Beaver County	11321.3	74.1297
							Millard County	32740	62.3202
							Sevier County	18309.5	74.2847
							Kane County	2956.48	78.4938
							Sanpete County	25736.8	76.0861
								129474	70.0327
						Nothern Utah
							Salt Lake County	12857.5	79.1281
							Morgan County	7492.74	78.7727
							Wasatch County	6992.39	76.4484
							Utah County	32995.5	73.4416
							Box Elder County	47856.3	66.6062
							Cache County	36921.4	76.1856
							Tooele County	8546.92	74.5874
							Davis County	8483.67	78.6547
							Rich County	18542	72.8484
							Weber County	14551.8	78.5058
							Summit County	13237.4	78.9852
								208478	73.9135
						Eastern Utah
							Uintah County	28025.6	33.91
							San Juan County	3276.63	75.55
							Duchesne County	39087	16
							Wayne County	6767.29	72.34
							Carbon County	4864.19	75.63
							Grand County	1766.22	73.33
							Piute County	6597.01	75.24
							Juab County	7159.23	75.16
							Garfield County	9168.73	75.1
							Emery County	12487.8	54.87
							Daggett County	2274.17	66.58
								121474	44.206

## Sheet: Development- Bear River
Information Used To Create Formulas
Annual Acre-Feet	220000							Project	Wetland Acres	Farm Acres	Mitigation Costs	ROW	Combination
Construction Costs for B	1662980000		Water Gained Per Region					Above Cutler Dam	2535	1898	262990000
Construction Costs for M	1802450000		Eastern	N/A				Cub River	297	775	33575000	12367875	Both
Mitigation Costs for B	801265000		Northern	220000				East Promentory	25533	4	2553320000
Mitigation Costs for M	117715000		Southwestern	N/A				Fielding	790	848	83240000	5804513	Both
Total Costs for B	2484252723		Total Utah	220000				Hyrum Enlargement	542	80	54600000
Total Costs for M	1941698888							Temple Fork	1	0	100000	994461	M only
Maintenance Costs for B	133038400		Cost Per Acre-Foot Per Region					Washakie	288	278	30190000
Maintenance Costs for M	144196000			B	M	Average		Whites Valley	4	80	800000	840874	M only
Amortized Cost for B	1.76582e+08		Eastern	N/A	N/A	NA		Weber Bay	6841	70	684450000	3361500	B only
Amortized Cost for M	1.42013e+08		Northern	802.643	645.516	724.08
Pumping Costs (Option 2)	97200000		Southwestern	N/A	N/A	NA
ROW Costs M	21533888		Total Utah	802.643	645.516	724.08
ROW Costs B	20007723
Mitigation Unit Cost (wetlands)	100000
Mitigation Unit Cost (farm)	5000

## Sheet: Development-Powell
Information Used To Create Formulas
Annual Acre Feet	62996
Construction Costs for Low Cost	1163325000		Water Savings Per Region
Construction Costs for High Cost	1798652000		Eastern	N/A
Mitigation Costs Low	7.59748e+07		Northern	N/A
Mitigation Costs High	5.60519e+08		Southwestern	62996
Land Acquisition Costs (Low)	0		Total Utah	62996
Land Acquistion (High)	0
Maintenance Costs for Low Cost	93093000
Maintenance Costs for High Cost	143890000
Net Power operations low	37052000
Net power operations high	108566000		Cost Per Acre-Foot Per Region
Amortized Cost for Low Cost	8.90844e+07			Low Cost	High Cost	Average
Amortized Cost for High Cost	1.6989e+08		Eastern	N/A	N/A
			Northern	N/A	N/A
			Southwestern	1414.13	2696.84	2055.48
			Total Utah	1414.13	2696.84	2055.48

## Sheet: Indoor- Toilets
Information Used To Create Formulas
Toilet Assumptions
Standard Gallons per Flush	6		Potential Water Savings Per Acre-Foot
LowFlow Gallons per Flush	1.6		Eastern	1751.21
Flushes/day/person	5.05		Northern	35797.9
Savings per year (gallons)	8110.3		Southwestern	4116.26
Toilets Per Housing unit	2.27		Total Utah	41666.6
Proportion HE	0.37
Population
Eastern Population	111681		Cost Per Acre-Foot
Northern Population	2282965		Eastern	846.986
Southwestern Population	262509		Northern	650.657
Total Utah Population	2657236		Southwestern	789.328
			Total Utah	672.588
Housing Units
Eastern Housing Units	50406
Northern Housing Units	791549
Southwestern Housing Units	110415
Total Utah Housing Units	952370
Utah toilets
2010 Standard toilets (Eastern)	72085.6
2010 Standard toilets (Northern)	1.13199e+06
2010 Standard toilets (Southwestern)	157904
2010 Standard toilets (Utah)	1.36198e+06
2010 Savings (Eastern)	1751.21
2010 Savings (Northern)	35797.9
2010 Savings (Southwestern)	4116.26
2010 Savings (Utah)	41666.6
Cost Assumptions
Toilet Cost	180
Installation Cost	110
Useful Life	25
Amortized Cost	20.5762
Total Cost (Eastern)	1.48325e+06
Total Cost (Northern)	2.32922e+07
Total Cost (Southwestern)	3.24908e+06
Total Cost (Utah)	2.80245e+07

## Sheet: Indoor- Showerheads
Information Used To Create Formulas
Toilet Assumptions
Standard Flow (gpm)	5		Potential Water Savings Per Acre-Foot
LowFlow (gpm)	2.5		Eastern	239.251
Showers/day/person	0.75		Northern	4890.74
Standard duration shower	6.8		Southwestern	562.367
LowFlow Duration Shower	8.5		Total Utah	5692.53
Savings per year (gallons)	3490.31
Showers Per Housing unit	1.95
Proportion High Efficiency	0.8
Population
Eastern Population	111681		Cost Per Acre-Foot
Northern Population	2282965		Eastern	303.154
Southwestern Population	262509		Northern	232.883
Total Utah Population	2657236		Southwestern	282.517
			Total Utah	240.733
Housing Units
Eastern Housing Units	50406
Northern Housing Units	791549
Southwestern Housing Units	110415
Total Utah Housing Units	952370
Utah showers
2010 Standard showers (Eastern)	19658.3
2010 Standard showers (Northern)	308704
2010 Standard showers (Southwestern)	43061.8
2010 Standard showers (Utah)	371424
2010 Savings (Eastern)	239.251
2010 Savings (Northern)	4890.74
2010 Savings (Southwestern)	562.367
2010 Savings (Utah)	5692.53
Cost Assumptions
Shower Cost	24.5
Installation Cost	27.5
Useful Life	25
Amortized Cost	3.68953
Total Cost (Eastern)	72530
Total Cost (Northern)	1.13897e+06
Total Cost (Southwestern)	158878
Total Cost (Utah)	1.37038e+06

## Sheet: Indoor-Washers
Information Used To Create Formulas
Toilet Assumptions
Standard Flow (gpm)	36.1
LowFlow (gpm)	24.2
Cycles per day/house	0.96
Savings per year (gallons)	4169.76
Percentage owning washers	0.73
Proportion high efficiency	0.46
Housing Units
Eastern Housing Units	50406
Northern Housing Units	791549
Southwestern Housing Units	110415
Total Utah Housing Units	952370
Utah washing machines
2010 Standard machines (Eastern)	19870
2010 Standard machines (Northern)	312029
2010 Standard machines (Southwestern)	43525.6		Potential Water Savings
2010 Standard machines (Utah)	375424		Eastern	254.268
2010 Savings (Eastern)	254.268		Northern	3992.88
2010 Savings (Northern)	3992.88		Southwestern	556.976
2010 Savings (Southwestern)	556.976		Total Utah	4804.13
2010 Savings (Utah)	4804.13
Cost Assumptions
Machine cost	587
Installation Cost	110
Useful Life	12
Amortized Cost	78.6393		Cost Per Acre-Foot
Total Cost (Eastern)	1.56257e+06		Eastern	6145.37
Total Cost (Northern)	2.45377e+07		Northern	6145.37
Total Cost (Southwestern)	3.42282e+06		Southwestern	6145.37
Total Cost (Utah)	2.95231e+07		Total Utah	6145.37

## Sheet: Outdoor- Barrels
Information Used To Create Formulas
Eastern Utah Number of Households	50406
Northern Utah Number of Households	791549		Water Gain Per Region
Southwestern Utah Number of Households	110415			Gallon	Acre Feet
Total Utah Number of Households	952370		Eastern	1.12422e+08	345.011
Useful Life (Years)	20		Northern	3.51157e+09	10776.6
Interest Rate	0.05		Southwestern	2.48949e+08	763.998
Commercial Barrel Cost	75		Total Utah	3.87294e+09	11885.6
Eastern Gallons per Barrel	2230.33
Northern Gallons per Barrel	4436.33
Southwestern Gallons per Barrel	2254.67		Cost Per Region
Ammortized Cost	6.01819		Eastern	303353
			Northern	4.7637e+06
			Southwestern	664499
			Total Utah	5.73155e+06
			Cost Per Acre-Foot Per Region
			Eastern	879.257
			Northern	442.04
			Southwestern	869.766
			Total Utah	482.225

## Sheet: Residential Outdoor
Information Used To Create Formulas				Watering at Night		Scheduling						Conversion
Eastern Utah Residential Water Use	46822.9		Region	Water Use in Turf Houses	At-night Savings	Scheduling Savings	# Houses	Price of Scheduler (Low)	Price of Scheduler (High)	Per AF (low)	Per Af (high)	Conversion Savings	Cost (low)	Cost High	per AF low	per Af high
Northern Utah Residential Water Use	428662		Eastern	41578.7	1122.63	8006.67	44760.5	143668	897925	17.9435	112.147	9280.54	2.70307e+07	3.80797e+07	2912.62	4103.18
Southwestern Utah Residential Water Use	52794.9		Northern	380651	10277.6	73300.7	702896	2.25609e+06	1.41005e+07	30.7785	192.366	84962.9	2.47465e+08	3.48618e+08	2912.62	4103.18
Total Utah Residential Water Use	528279		Southwestern	46881.9	1265.81	9027.87	98048.5	314707	1.96692e+06	34.8594	217.872	10464.2	3.04783e+07	4.29366e+07	2912.62	4103.18
Eastern Utah Number of Households	50406
Northern Utah Number of Households	791549
Southwestern Utah Number of Households	110415
Total Utah Number of Households	952370
Watering at Night Savings	0.05
Already Watering at night	0.46
Scheduling Savings	0.3
Already Scheduling	0.1
Scheduling cost (low)	40
Scheduling cost (high)	250
Percentage water underground	0.733
Landscape conversion savings	0.286
Low Cost (Per Square Foot	1.37
High Cost (Per Square Foot)	1.93
Average Area Converted (Yard Size in Square Feet)	2126
Already Xeriscaping	0.112
Useful Life (Years)	20
Interest Rate	0.05
			Watering at Night	Scheduling	Conversion
		Eastern	1122.63	8006.67	9280.54
		Northern	10277.6	73300.7	84962.9
		Southwestern	1265.81	9027.87	10464.2
		Total Utah	12666	90335.2	104708
		Average Cost Per Region
			Watering at Night	Scheduling	Conversion
		Eastern	0	65.0454	3507.9
		Northern	0	111.572	3507.9
		Southwestern	0	126.365	3507.9
		Total Utah	0	108.927	3507.9

[truncated: 5 more sheets: Water Reuse, Commercial, Graph Information, Total Table, Utah Projections]
